# Supplementary material
Source: PubMed Central journal article supplement (PMC4435590)
Supplement: mt201490x2.pdf [file mt201490x2.pdf]

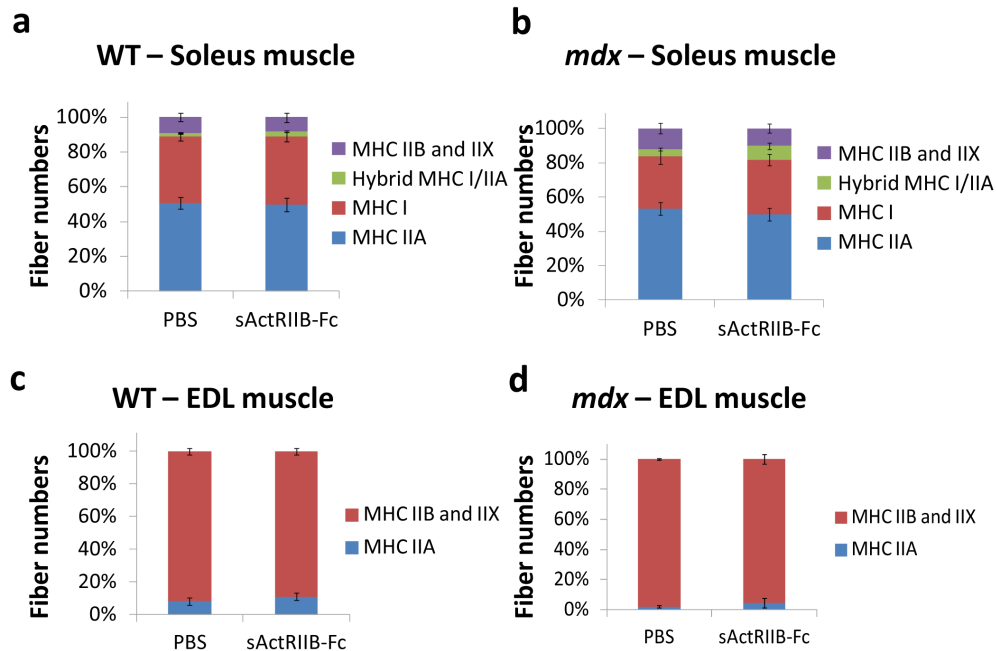

**Supplemental Figure 2. Effect of sActRIIB-Fc on fiber-type distribution of EDL and soleus muscles from wild-type and *mdx* mice.**

**(a-d)** Fiber-type distribution of *soleus* and *EDL* muscles from wild-type mice **(a,c)** and *mdx* mice **(b,d)** after 4 months treatment with sActRIIB-Fc compared to muscles from PBS treated control mice. **(a,b)** Fiber-type composition of the *soleus* muscle as shown by the relative fiber-type distribution from entire transverse sections following immunostaining with anti-MHCI and MHCIIA antibodies. Unstained fibers (non MHC I/IIA) were considered IIB or IIX. **(c,d)** Fiber-type composition of the *EDL* muscle as shown by the relative fiber-type distribution from entire transverse sections following immunostaining with anti-MHCI and MHCIIA antibodies. Unstained fibers (non MHC I/IIA) were considered IIB or IIX. MHC I positive fibers were only exceptionally seen and are therefore not depicted. Values are shown as means  $\pm$  SEM.
