# Supplementary material
Source: PubMed Central journal article supplement (PMC4435590)
Supplement: mt201490x3.pdf [file mt201490x3.pdf]

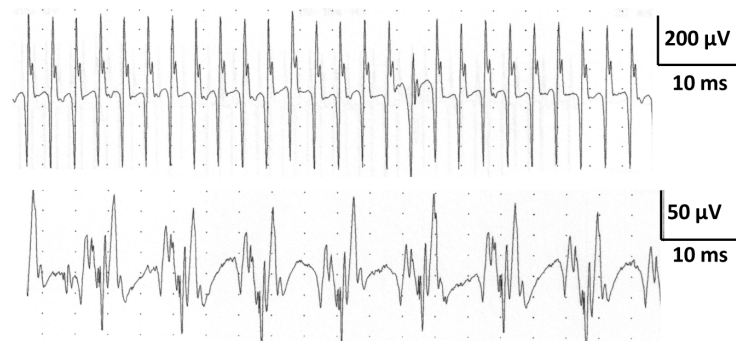

**Supplemental Figure 3. Effect of sActRIIB-Fc on EMG recordings of *mdx* mice.**

Examples of spontaneous potentials recorded under anesthesia in *triceps brachialis* muscle of *mdx* mice. The upper trace was recorded in a PBS treated mouse, the lower trace in a sActRIIB-Fc treated mouse. Both traces show complex repetitive discharges (sensitivity, 200  $\mu$ V/division upper trace, 50 $\mu$ V/division lower trace, sweep speed, 10 ms/division).
