# Supplementary material
Source: PubMed Central journal article supplement (PMC4435590)
Supplement: mt201490x5.pdf [file mt201490x5.pdf]

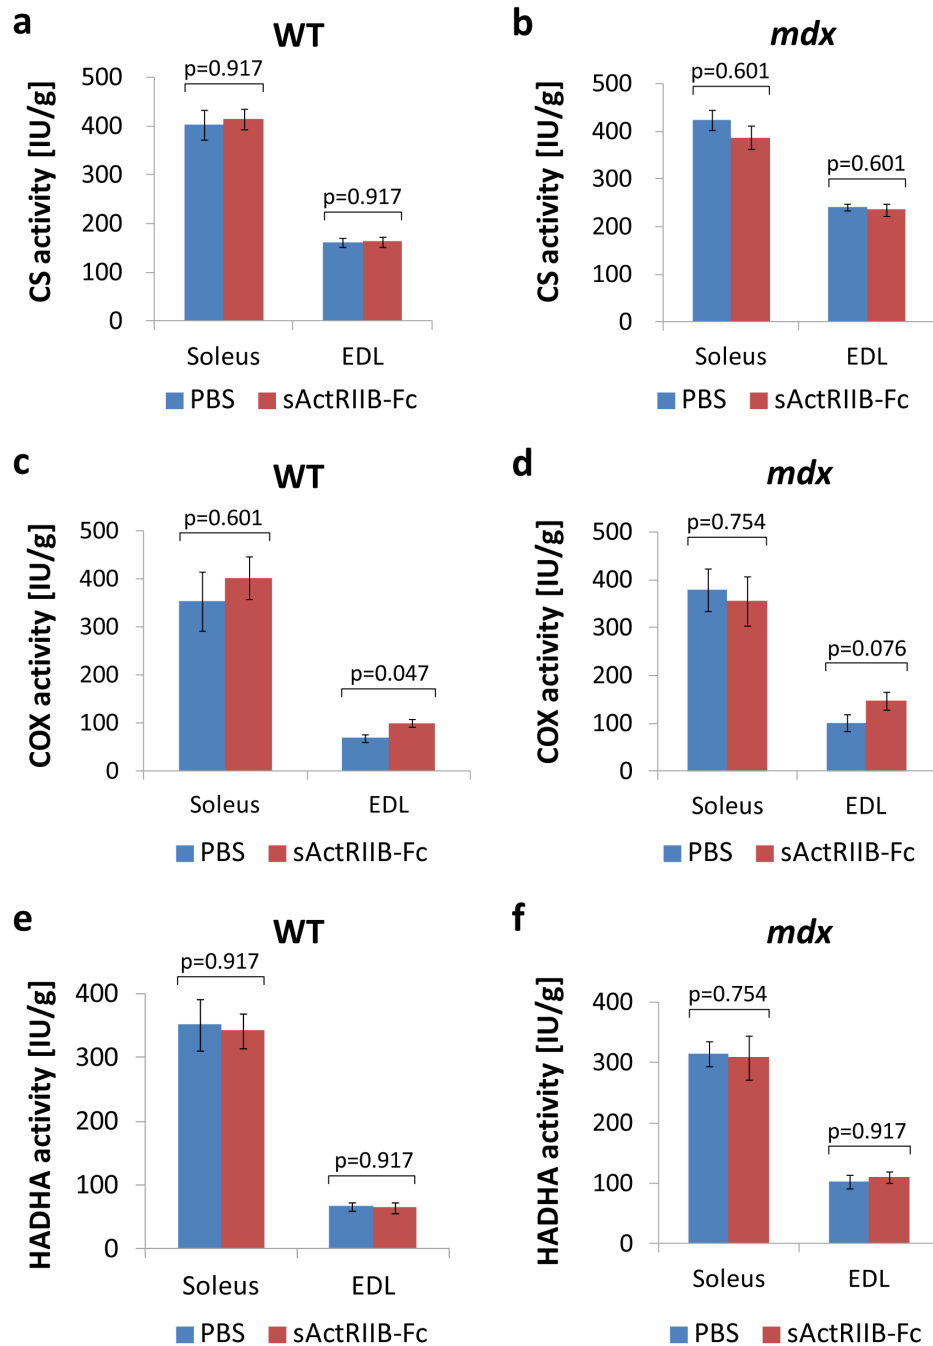

**Supplemental Figure 5. Effect of sActRIIB-Fc on enzymes activities of mitochondrial respiratory chain in EDL and soleus muscles from wild-type and *mdx* mice.**

(a-f) Wild-type and *mdx* mice were systemically treated with sActRIIB-Fc or PBS for 4 months and enzyme activities were measured in muscle homogenates from EDL (n=5 for each condition) and soleus muscles (n=5 for each condition) for (a,b) citrate synthase [CS], (c,d) cytochrome-C oxidase [COX] and (e,f) hydroxyacyl-CoA dehydrogenase [HADHA]. Values are shown as means  $\pm$  SEM. p-Values were calculated using the nonparametric *U*-Test.
