# Supplementary material
Source: PubMed Central journal article supplement (PMC4435590)
Supplement: mt201490x6.pdf [file mt201490x6.pdf]

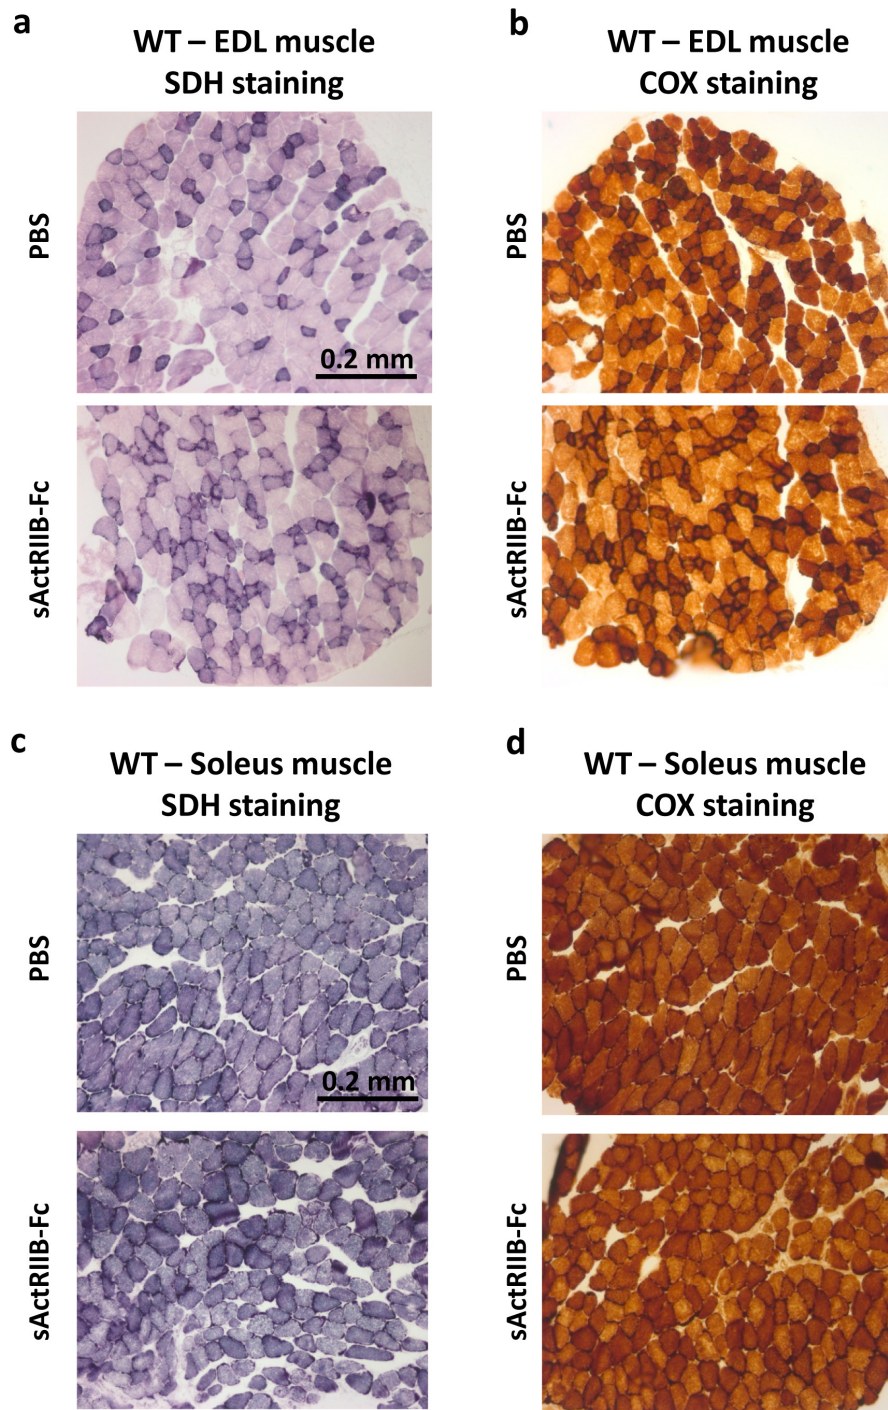

**Supplemental Figure 6.** Effect of sActRIIB-Fc on SDH and COX enzyme activity on muscle sections of *EDL* and *soleus* muscles from wild-type mice.

(a-d) Images of transverse sections of (a,b) *EDL* muscle and (c,d) *soleus* muscle from wild-type mice stained for (a,c) succinate dehydrogenase [SDH] activity and (b,d) cytochrome-C oxidase [COX] activity after 4 months treatment with sActRIIB-Fc in comparison to muscles from PBS treated control mice.
