# Supplementary material
Source: PubMed Central journal article supplement (PMC4435590)
Supplement: mt201490x7.pdf [file mt201490x7.pdf]

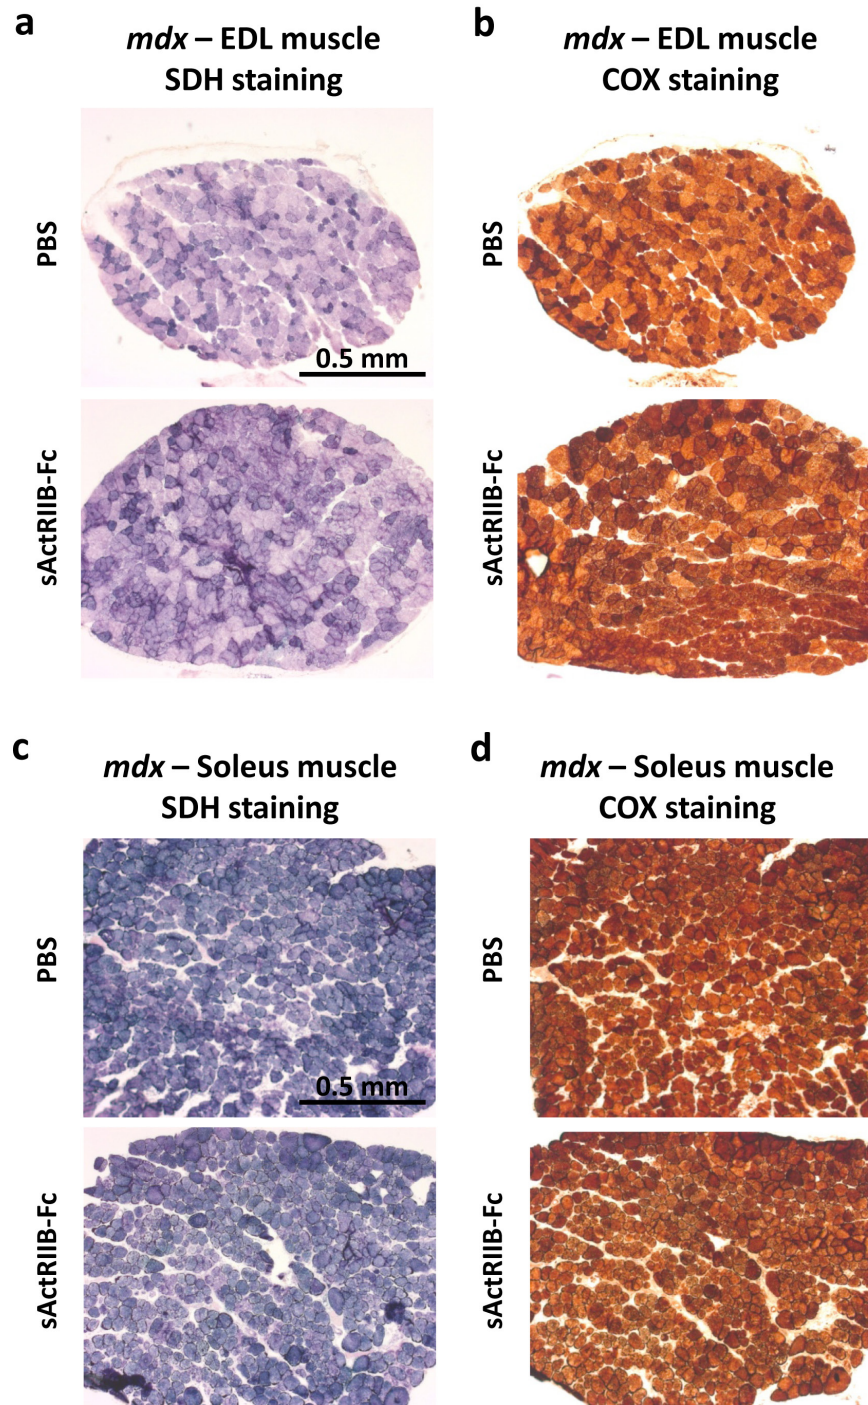

**Supplemental Figure 7:** Effect of sActRIIB-Fc on SDH and COX enzyme activity on muscle sections of *EDL* and *soleus* muscles from *mdx* mice.

(a-d) Images of transverse sections of (a,b) *EDL* muscle and (c,d) *soleus* muscle from *mdx* mice stained for (a,c) SDH activity and (b,d) COX activity after 4 months treatment with sActRIIB-Fc in comparison to muscles from PBS treated control mice.
