# Supplementary material
Source: PubMed Central journal article supplement (PMC4435590)
Supplement: mt201490x8.pdf [file mt201490x8.pdf]

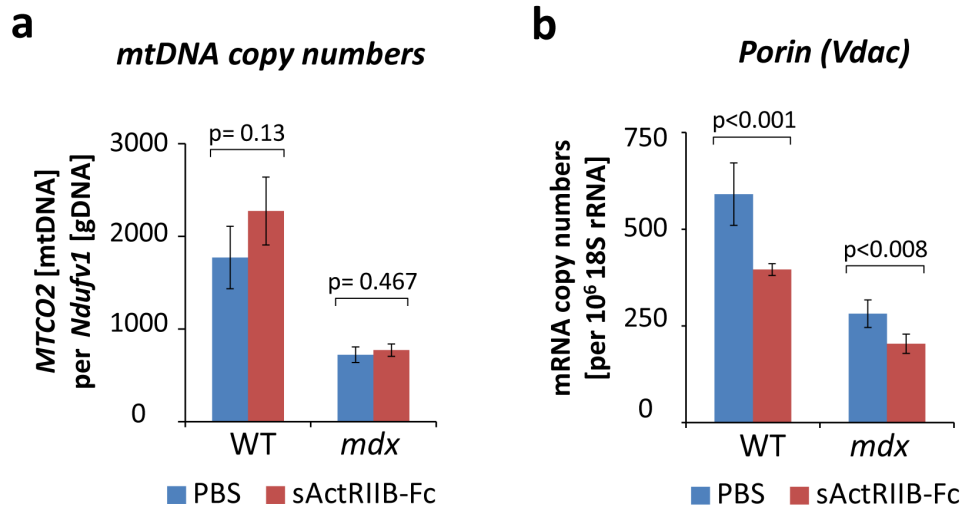

**Supplemental Figure 8. Effect of sActRIIB-Fc on mitochondrial DNA copy number and transcription of the gene encoding the mitochondrial protein porin in muscles from wild-type and *mdx* mice.**

All investigations were done after a 4 months treatment of wild-type (n=5 for each condition) and *mdx* mice (n=5 for each condition) with either sActRIIB-Fc or PBS (controls). **(a)** mitochondrial DNA copy numbers expressed as the ratio between *MTCO2* [mtDNA] per *Ndufv1* [gDNA] copy numbers in the *TA* muscle from wild-type and *mdx* mice to quantify mtDNA/myonucleus ratio. **(b)** *Porin (Vdac1)* relative copy number in the *TA* muscle from wild-type and *mdx* mice as expressed per 10<sup>6</sup> x 18S rRNA copies. Values are shown as means ± SEM. p-Values were calculated using the nonparametric *U*-Test.
