# Supplementary material
Source: PubMed Central journal article supplement (PMC4435590)
Supplement: mt201490x9.pdf [file mt201490x9.pdf]

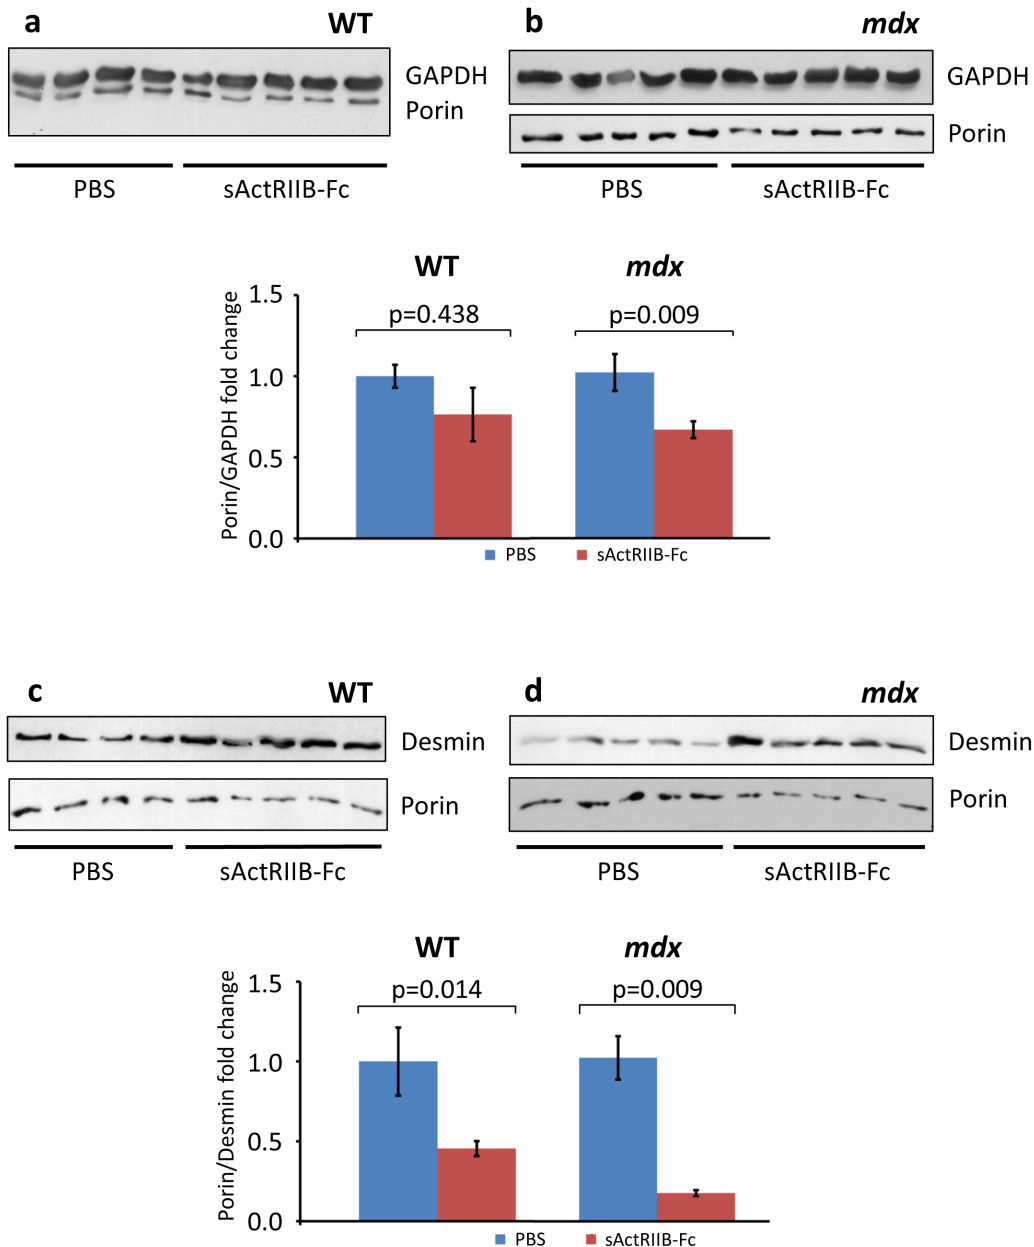

**Supplemental Figure 9. Effect of sActRIIB-Fc on the expression of the mitochondrial protein porin in muscles from wild-type and *mdx* mice.**

The Western blots depict bands of porin (Vdac1) referenced to GAPDH (**a,b**) and to desmin (**c,d**) of TA muscles from wild-type ( $n=5$  for each condition) (**a,c**) and *mdx* ( $n=5$  for each condition) (**b,d**) mice after 4 months of treatment with sActRIIB-Fc in comparison to muscles from PBS treated control mice. The bar charts depict the quotients of porin (Vdac1) band densities / GAPDH (desmin) band densities with the average of the PBS-treated samples normalized to 1. Values are shown as means  $\pm$  SEM. p-Values were calculated using the nonparametric *U*-Test.
