# Supplementary material
Source: PubMed Central journal article supplement (PMC4435590)
Supplement: mt201490x11.pdf [file mt201490x11.pdf]

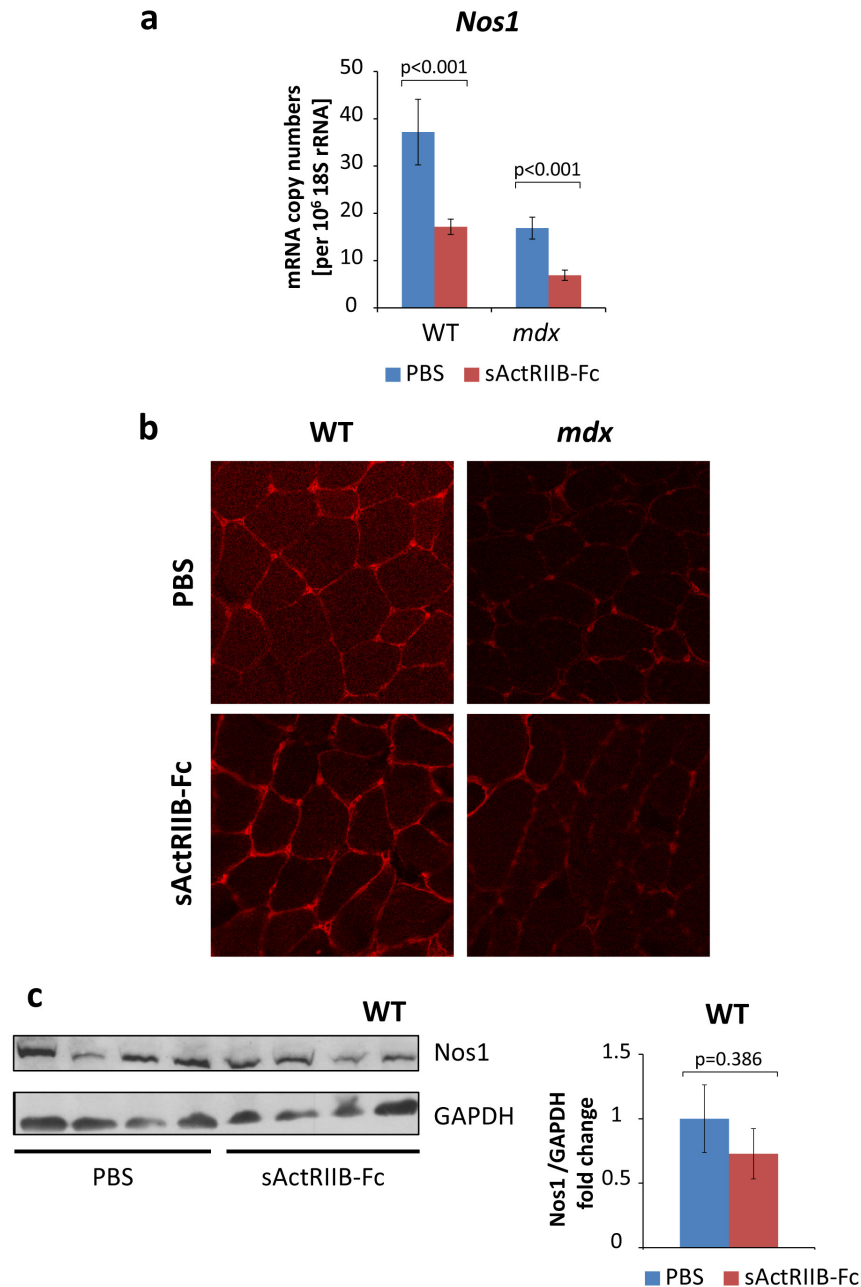

**Supplemental Figure 11. Effect of sActRIIB-Fc on the expression of Nos1 in muscles from wild-type and *mdx* mice.**

All investigations were done after a 4 months treatment of wild-type and *mdx* mice with either sActRIIB-Fc or PBS (controls). **(a)** *Nos1* relative copy number in the TA muscle from wild-type (n=5 for each condition) and *mdx* mice (n=5 for each condition) as expressed per 10<sup>6</sup> x 18S rRNA copies. **(b)** Representative images following immunohistochemistry against Nos1. **(c)** The Western blots depict bands of Nos1 referenced to GAPDH of TA muscles from wild-type mice (n=4 for each condition). The bar charts depict the quotients of Nos1 band densities / GAPDH band densities with the average of the PBS-treated samples normalized to 1. Values are shown as means  $\pm$  SEM. p-Values were calculated using the nonparametric U-Test.
