# Supplementary material
Source: PubMed Central journal article supplement (PMC4435590)
Supplement: mt201490x13.pdf [file mt201490x13.pdf]

## Supplemental Online Information

### Blockade of ActRIIB signaling triggers muscle fatigability and metabolic myopathy

Karima Relizani, Etienne Mouisel, Benoit Giannesini, Christophe Hourdé, Ketan Patel, Susanne Morales Gonzalez, Kristina Jülich, Alban Vignaud, France Piétri-Rouxel, Dominique Fortin, Luis Garcia, Stéphane Blot, Olli Ritvos, David Bendahan, Arnaud Ferry, Renée Ventura-Clapier, Markus Schuelke and Helge Amthor

#### TABLE OF CONTENTS

|                                                                                                                                                                                                           |           |
|-----------------------------------------------------------------------------------------------------------------------------------------------------------------------------------------------------------|-----------|
| <b>Supplemental Methods</b> .....                                                                                                                                                                         | <b>2</b>  |
| <i>Measurement of contractile properties</i> .....                                                                                                                                                        | 2         |
| <i>Histology</i> .....                                                                                                                                                                                    | 2         |
| <i>RT-qPCR</i> .....                                                                                                                                                                                      | 3         |
| <i>Measurement of enzyme activities</i> .....                                                                                                                                                             | 4         |
| <b>Supplemental Figures</b> .....                                                                                                                                                                         | <b>5</b>  |
| <i>Supplemental Figure 1. Effect of sActRIIB-Fc on body weight and muscle weight in wild-type and mdx mice.</i> .....                                                                                     | 5         |
| <i>Supplemental Figure 2. Effect of sActRIIB-Fc on fiber-type distribution of EDL and soleus muscles from wild-type and mdx mice.</i> .....                                                               | 6         |
| <i>Supplemental Figure 3. Effect of sActRIIB-Fc on EMG recordings of mdx mice.</i> .....                                                                                                                  | 6         |
| <i>Supplemental Figure 4. Effect of myostatin on capillaries and endothelial cell proliferation.</i> .....                                                                                                | 7         |
| <i>Supplemental Figure 5. Effect of sActRIIB-Fc on enzymes activities of mitochondrial respiratory chain in EDL and soleus muscles from wild-type and mdx mice.</i> .....                                 | 8         |
| <i>Supplemental Figure 6. Effect of sActRIIB-Fc on SDH and COX enzyme activity on muscle sections of EDL and soleus muscles from wild-type mice.</i> .....                                                | 9         |
| <i>Supplemental Figure 7: Effect of sActRIIB-Fc on SDH and COX enzyme activity on muscle sections of EDL and soleus muscles from mdx mice.</i> .....                                                      | 10        |
| <i>Supplemental Figure 8. Effect of sActRIIB-Fc on mitochondrial DNA copy number and transcription of the gene encoding the mitochondrial protein Porin in muscles from wild-type and mdx mice.</i> ..... | 11        |
| <i>Supplemental Figure 9. Effect of sActRIIB-Fc on the expression of the mitochondrial protein Porin in muscles from wild-type and mdx mice.</i> .....                                                    | 12        |
| <i>Supplemental Figure 10. Effect of myostatin/ActRIIB signaling on muscle phenotype.</i> .....                                                                                                           | 13        |
| <i>Supplemental Figure 11. Effect of sActRIIB-Fc on the expression of Nos1 in muscles from wild-type and mdx mice.</i> .....                                                                              | 14        |
| <b>Supplemental Videos</b> .....                                                                                                                                                                          | <b>15</b> |
| <i>Supplemental Video. Effect of sActRIIB-Fc on incremental speed running in mdx mice.</i> .....                                                                                                          | 15        |
| <b>Supplemental References</b> .....                                                                                                                                                                      | <b>16</b> |

## SUPPLEMENTAL METHODS

### **Measurement of contractile properties**

The contractile properties of *extensor digitorum longus* (*EDL*) and *soleus* muscles were studied *in vitro* according to previously published protocols.<sup>1</sup> Muscles were soaked in an oxygenated Tyrode solution (95% O<sub>2</sub> and 5% CO<sub>2</sub>) containing 58.5 mM NaCl, 24 mM NaHCO<sub>3</sub>, 5.4 mM KCl, 1.2 mM KH<sub>2</sub>PO<sub>4</sub>, 1.8 mM CaCl<sub>2</sub>, 1 mM MgSO<sub>4</sub>, and 10 mM glucose (pH7.4) and maintained at a temperature of 22°C. One muscle tendon was attached to a lever arm of a servomotor system (300B, Dual-Mode Lever, Aurora, Dublin; Ireland). After equilibration (30 min), field electrical stimulation was delivered through electrodes running parallel to the muscle. Pulses of 1 ms were generated by a high power stimulator (701B, Aurora). Absolute maximal isometric tetanic force (P<sub>0</sub>) was measured during tetanic contractions (frequency of 50-100 Hz, train of stimulation of 1, 500 ms for *soleus* and 750 ms for *EDL*). The muscle length was adjusted to an optimum (L<sub>0</sub>) that produced P<sub>0</sub>. Specific maximal isometric force (sP<sub>0</sub>) was calculated by dividing the force by the weight of the muscle. Fatigue resistance was then determined after a 5 min rest period. The muscles were stimulated at 75 Hz during 500 ms, every 2 s, for 3 min. The time taken for initial force to fall by 50% (*EDL*) or 30% (*soleus*) was then measured. All data were recorded and analyzed on a microcomputer, using the PowerLab system (4SP, ADInstruments, Oxford, UK) and software (Chart4, ADInstruments).

### **Histology**

For CD31 expression, frozen unfixed 12 µm sections of *EDL* and *soleus* muscles were blocked 1 h in PBS plus 2% BSA and 2% SVF. Sections were then incubated overnight with primary antibodies: anti-CD31 (Pharmingen, Ranges, France) and anti-laminin (Dako, Les Ulis, France). After washes in PBS, sections were incubated 1 h at room temperature with secondary antibodies with various fluorophores (Alexa Fluor®, Invitrogen, Saint Aubain, France). After washes in PBS, slides were mounted in Fluoromount-G (Southern Biotech, Birmingham, Alabama, USA).

For expression analysis of myosin heavy chain (MHC) isoforms, primary antibodies were: anti-MHCI (hybridoma#BA-D5, Deutsche Sammlung von Mikroorganismen und Zellkulturen DSMZ, Braunschweig, Germany) and anti-MHCIIa (hybridoma#SC-71, DSMZ). For MHC-immunohistochemistry, frozen unfixed 12 µm sections were blocked 1 h in PBS plus 2% BSA and 2% SVF. Sections were then incubated overnight with primary antibodies against laminin (Dako) and MHC I and MHCIIa isoforms. After washes in PBS, sections were incubated 1 h with secondary antibodies with various fluorophores (Alexa Fluor®, Invitrogen). After washes in PBS, slides were finally mounted in Fluoromont-G. Morphometric analyses were made on whole sections of *EDL* and *soleus* muscles. Images were captured using a digital camera (Hamamatsu ORCA-AG, Massy, France) attached to a motorized fluorescence microscope (Zeiss Axiomager Z1, Jena, Germany), and morphometric analyses were made using the MetaMorph v7.5 software (Molecular Devices, Sunnyvale, California, USA).

For Nos1 expression, frozen unfixed 12 µm sections of *EDL* muscles were rehydrated in PBS, fixed with 4% PFA for 10 min, blocked in 4% BSA for 1 h. Sections were then incubated overnight at room temperature with primary antibodies: anti-Nos1 (Abcam, Paris France). After washes in PBS, sections were incubated 1 h at room temperature with secondary Alexa594-conjugated antibodies (Alexa Fluor®, Invitrogen). After washes in PBS, slides were mounted in Fluoromount-G. Images were captured by confocal laser scanning microscope (Leica SPE DM2500, Wetzlar, Germany).

**RT-qPCR**

Total RNA was isolated from frozen muscle after pulverization in liquid nitrogen from C<sub>2</sub>C<sub>12</sub> cell pellets and from endothelial human cells with the Trizol<sup>®</sup> (Invitrogen) extraction protocol. Isolated RNA was quantified using the NanoDrop<sup>®</sup> ND-1000 spectrophotometer (Thermo Scientific, Schwerte, Germany) and cDNA was synthesized using the ThermoScript<sup>®</sup> RT PCR System (Invitrogen). After cDNA synthesis, Real Time PCR was performed by using the SYBR Green<sup>®</sup> PCR Master Mix Protocol (Applied Biosystems, Darmstadt, Germany) in triplicate on the ECO Real-Time PCR System (Illumina, Eindhoven, The Netherlands) with a hotstart-Taq polymerase. A 10 min denaturation step at 94°C was followed by 40 cycles of denaturation at 94°C for 10 s and annealing/extension at 60°C for 30 s. Before sample analysis we had determined for each gene the PCR efficiencies with a standard dilution series (10<sup>0</sup>-10<sup>7</sup> copies/μl),<sup>f</sup> which subsequently enabled us to calculate the copy numbers from the C<sub>t</sub> values.<sup>2</sup> mRNA levels were normalized to 18S rRNA. The sequences for the primers used are listed below:

**Table of oligonucleotides used for RT-qPCR of mouse and human tissues**

| Gene                                                  | Primer sequence (5'–3') | Direction |
|-------------------------------------------------------|-------------------------|-----------|
| <b><i>Oligonucleotide primers used for mice</i></b>   |                         |           |
| <i>Pparβ</i>                                          | AGCCACAACGCACCCTTT      | forward   |
|                                                       | CGGTAGAACACGTGCACACT    | reverse   |
| <i>Pgc1α</i>                                          | GAAAGGGCCAAACAGAGAGA    | forward   |
|                                                       | GTAAATCACACGGCGCTCTT    | reverse   |
| <i>Vegf-A</i>                                         | AAGCCAGCACATAGGAGAGATGA | forward   |
|                                                       | TCTTTCTTTGGTCTGCATTACA  | reverse   |
| <i>Cpt1b</i>                                          | TCGCAGGAGAAAACACCATGT   | forward   |
|                                                       | AACAGTGCTTGCGGATGTG     | reverse   |
| <i>Pdk4</i>                                           | AGGTCGAGCTGTTCTCCCGCT   | forward   |
|                                                       | GCGGTCAGGCAGGATGTCAAT   | reverse   |
| <i>Nos1</i>                                           | AAGGAGCAAGGAGGCCATAT    | forward   |
|                                                       | ATATGTTCTGAGGGTGACCCC   | reverse   |
| <i>Vdac1 (Porin)</i>                                  | ACTGTGGAAGACCAGCTTGC    | forward   |
|                                                       | TGCTCCCTCTTGACCCCTGT    | reverse   |
| <i>MTCO2</i>                                          | GCCGACTAAATCAAGCAACA    | forward   |
|                                                       | CAATGGGCATAAAGCTATGG    | reverse   |
| <i>18S rRNA</i>                                       | CATTCGAACGTCTGCCCTATC   | forward   |
|                                                       | CTCCCTCTCCGGAATCGAAC    | reverse   |
| <b><i>Oligonucleotide primers used for humans</i></b> |                         |           |
| <i>ACVR2B</i>                                         | AGCCGTCTATTGCCACA       | forward   |
|                                                       | CATGTACCGTCTCGTGCTA     | reverse   |
| <i>ACVR2A</i>                                         | AGGTTGTTGGCTGGATGAT     | forward   |
|                                                       | GCCCTCACAGCAACAAAAAT    | reverse   |
| <i>ALK4</i>                                           | GTCTGGTTCAGGGAAGCAG     | forward   |
|                                                       | GGACCCGTGCTCATGATAGT    | reverse   |
| <i>ALK5</i>                                           | TTGCTCCAACCACAGAGTG     | forward   |
|                                                       | TGAATTCCACCAATGGAACA    | reverse   |
| <i>18S rRNA</i>                                       | CATTCGAACGTCTGCCCTATC   | forward   |
|                                                       | CTCCCTCTCCGGAATCGAAC    | reverse   |

***Measurement of enzyme activities***

**[1] Enolase:** Enolase-catalyzed conversion of 2-phospho-d-glycerate to phosphoenolpyruvate at 25°C was monitored spectrophotometrically at 340 nm. Activity was expressed in international units (IU) per mg of protein.

**[2] Citrate synthase:** Citrate synthase-catalyzed conversion of oxaloacetate and acetyl-CoA to citrate at 30°C was monitored spectrophotometrically at 412 nm. Activity was expressed in international units (IU) per mg of protein.

**[3] Cytochrome C oxidase (COX):** Cytochrome C oxidase-catalyzed oxidation of cytochrome C at 30°C was monitored spectrophotometrically at 550 nm. Activity was expressed in international units (IU) per mg of protein.

**[4] Hydroxyacyl CoA dehydrogenase (HADHA):** HADHA-catalyzed conversion of acetoacetyl-CoA to hydroxybutyryl-CoA at 30°C was monitored spectrophotometrically at 340 nm. Activity was expressed in international units (IU) per mg of protein.

**SUPPLEMENTAL REFERENCES**

1. Agbulut, O, Vignaud, A, Hourde, C, Mouisel, E, Fougerousse, F, Butler-Browne, GS *et al.* (2009) Slow myosin heavy chain expression in the absence of muscle activity. *Am J Physiol Cell Physiol* **296**:C205-C214.
2. Pfaffl, MW (2001) A new mathematical model for relative quantification in real-time RT-PCR. *Nucleic Acids Res* **29**:e45.
